# Supplementary material for: Effects of iodine status on thyroid volume and goiter in children living in an iodine-replete area
Source: PubMed Central journal article supplement — Eur Thyroid J. 2023 Dec 18;12(6):e230219. doi: 10.1530/ETJ-23-0219 (PMC10762586; doi:10.1530/etj-23-0219), 2023-12-18
Supplement: supplementary_tables.pdf [file supplementary_tables.pdf]

1 Supplementary Table 1. Clinical characteristics of participants according to iodine status

|                                                | Deficient (n = 12) | Adequate (n = 48) | Mild excess (n = 35) | Moderate excess (n = 49) | Severe excess (n = 84) |
|------------------------------------------------|--------------------|-------------------|----------------------|--------------------------|------------------------|
| UIC range, µg/L                                | < 100              | 100–299           | 300–499              | 500–999                  | ≥1000                  |
| Boys, n (%)                                    | 3 (25.0)           | 22 (45.8)         | 21 (60.0)            | 31 (63.3)                | 46 (54.8)              |
| Height z-score                                 | 0.17 ± 0.66        | 0.44 ± 0.66       | 0.57 ± 1.16          | 0.13 ± 0.86              | 0.46 ± 0.94            |
| Weight z-score                                 | -0.09 ± 0.56       | 0.07 ± 0.88       | 0.30 ± 1.05          | -0.24 ± 0.85             | 0.29 ± 0.99            |
| Body mass index z-score                        | -0.30 ± 0.70       | -0.25 ± 0.86      | 0.02 ± 1.08          | -0.43 ± 0.88             | 0.09 ± 0.99            |
| Body surface area, m <sup>2</sup>              | 0.80 ± 0.04        | 0.82 ± 0.06       | 0.84 ± 0.08          | 0.80 ± 0.05              | 0.83 ± 0.08            |
| Palpable goiter at physical examination, n (%) | 1 (8.3)            | 7 (14.6)          | 2 (5.7)              | 11 (22.5)                | 22 (26.2)              |
| Parental history of thyroid disease, n (%)     | 0 (0.0)            | 1 (2.1)           | 2 (5.7)              | 2 (4.1)                  | 5 (6.0)                |
| Maternal education level ≥ college, n (%)      | 12 (100.0)         | 41 (85.4)         | 27 (77.1)            | 46 (93.9)                | 70 (83.3)              |
| Free thyroxine, ng/dL                          | 1.2 ± 0.1          | 1.2 ± 0.1         | 1.1 ± 0.1            | 1.2 ± 0.1                | 1.1 ± 0.1              |
| Thyroid                                        | 2.5                | 2.3               | 2.4 (1.8–3.0)        | 2.5 (1.6–3.3)            | 2.7                    |

|                                             |               |               |               |               |               |
|---------------------------------------------|---------------|---------------|---------------|---------------|---------------|
| stimulating hormone, $\mu\text{IU/mL}$      | (1.5–3.0)     | (1.8–3.1)     |               |               | (2.1–3.5)     |
| Subclinical hypothyroidism, n (%)           | 1 (8.3)       | 2 (4.2)       | 2 (5.7)       | 2 (4.1)       | 8 (9.5)       |
| Thyroid volume, mL                          | $2.5 \pm 0.8$ | $2.4 \pm 0.5$ | $2.4 \pm 0.7$ | $2.5 \pm 0.8$ | $2.7 \pm 0.8$ |
| Goiter on US (age-specific criteria), n (%) | 4 (33.3)      | 6 (12.5)      | 8 (22.9)      | 14 (28.6)     | 27 (32.1)     |
| Goiter on US (BSA-specific criteria), n (%) | 5 (41.7)      | 11 (22.9)     | 10 (28.6)     | 19 (38.8)     | 34 (40.5)     |

2 Data are expressed as the mean  $\pm$  standard deviation, median (interquartile range), or number  
3 (%).

4 Supplementary Table 2. Distribution of thyroid volume (mL) according to sex and body surface area

| Body surface area (m <sup>2</sup> ) | Total |      |      |      | Boys |      |      |      | Girls |      |      |      |
|-------------------------------------|-------|------|------|------|------|------|------|------|-------|------|------|------|
|                                     | N     | P3   | P50  | P97  | n    | P3   | P50  | P97  | n     | P3   | P50  | P97  |
| 0.6                                 | 4     | 1.46 | 1.69 | 2.26 | 2    | 1.81 | 2.05 | 2.29 | 2     | 1.45 | 1.52 | 1.59 |
| 0.7                                 | 88    | 1.29 | 2.32 | 4.02 | 46   | 1.23 | 2.22 | 3.55 | 42    | 1.44 | 2.45 | 4.13 |
| 0.8                                 | 109   | 1.53 | 2.52 | 4.12 | 59   | 1.77 | 2.39 | 4.10 | 50    | 1.47 | 2.61 | 4.31 |
| 0.9                                 | 26    | 1.53 | 2.64 | 3.94 | 15   | 1.56 | 2.71 | 3.95 | 11    | 1.72 | 2.52 | 3.67 |
| 1.0                                 | 1     | -    | 1.95 | -    | 1    | -    | 1.95 | -    | -     | -    | -    | -    |
| Total                               | 228   | 1.44 | 2.43 | 4.10 | 123  | 1.41 | 2.33 | 4.03 | 105   | 1.44 | 2.52 | 4.16 |

5 P3, 3rd percentile; P50, 50th percentile; P97, 97th percentile

Supplementary Table 3. Comparison of clinical characteristics according to the presence of goiter on the US based on BSA-specific criteria

|                                                 | Goiter-US (-)<br>(n = 149) | Goiter-US (+)<br>(n = 79) | <i>p</i> |
|-------------------------------------------------|----------------------------|---------------------------|----------|
| Boys, n (%)                                     | 87 (58.4)                  | 36 (45.6)                 | 0.088    |
| Body mass index z-score                         | -0.13 ± 0.93               | -0.12 ± 1.02              | 0.936    |
| Body surface area, m <sup>2</sup>               | 0.82 ± 0.07                | 0.82 ± 0.0                | 0.611    |
| Palpable goiter at physical examination, n (%)  | 21 (14.1)                  | 22 (27.9)                 | 0.019    |
| Parental history of thyroid disease, n (%)      | 7 (4.7)                    | 3 (3.8)                   | 0.999    |
| Maternal education level ≥ college, n (%)       | 129 (86.6)                 | 67 (84.8)                 | 0.869    |
| Thyroid stimulating hormone, μIU/mL             | 2.4 (1.8-3.4)              | 2.6 (1.9-3.3)             | 0.977    |
| Subclinical hypothyroidism, n (%)               | 10 (6.7)                   | 5 (6.3)                   | 0.999    |
| Thyroid volume, mL                              | 2.1 ± 0.4                  | 3.3 ± 0.6                 | <0.001   |
| Goiter-US based on age-specific criteria, n (%) | 2 (1.34)                   | 57 (72.2)                 | <0.001   |
| Focal lesion <sup>a</sup> , n (%)               | 34 (22.8)                  | 41 (51.2)                 | <0.001   |

Data are expressed as the mean ± standard deviation, median (interquartile range), or number (%).

<sup>a</sup>Focal lesion was defined as thyroid cysts, nodules, or intrathyroidal thymus.

US, ultrasound; BSA, body surface area

Supplementary Table 4. Association between covariates and thyroid volume (mL) (unadjusted)

| Covariates                                                       | Thyroid volume ( $\beta$ , 95% CI) | <i>p</i> |
|------------------------------------------------------------------|------------------------------------|----------|
| Age, years                                                       | 0.00 (−0.06, 0.06)                 | 0.935    |
| Boys (vs. girls)                                                 | −0.11 (−0.30, 0.08)                | 0.260    |
| Body mass index z-scores                                         | 0.15 (0.06, 0.25)                  | 0.002    |
| Body surface area, m <sup>2</sup>                                | 2.23 (0.89, 3.57)                  | 0.001    |
| Parental history of thyroid disease                              | −0.13 (−0.59, 0.33)                | 0.587    |
| Maternal education level $\geq$ college (vs. $\leq$ high school) | −0.02 (−0.29, 0.25)                | 0.880    |
| Free thyroxine, ng/dL                                            | 0.64 (−0.18, 1.46)                 | 0.129    |
| Log-transformed thyroid stimulating hormone, $\mu$ IU/mL         | −0.05 (−0.26, 0.15)                | 0.601    |
| Subclinical hypothyroidism (vs. normal)                          | −0.21 (−0.59, 0.65)                | 0.275    |

CI, confidence interval
